# Supplementary material for: Dietary specialization drives multiple independent losses and gains in the bitter taste gene repertoire of Laurasiatherian Mammals
Source: PubMed Central journal article supplement (PMC4928315; doi:10.1186/s12983-016-0161-1), 2016-06-29

**Table S1.** Whole-genome assemblies analyzed in the present study.

| Name                  | Species                           | Prefix <sup>a</sup> | Assembly                            | N50 <sup>b</sup> | Source  | Reference                   |
|-----------------------|-----------------------------------|---------------------|-------------------------------------|------------------|---------|-----------------------------|
| Cow                   | <i>Bos taurus</i>                 | Bota                | Bos_taurus_UMD_3.1.1                | 97kb             | NCBI    | Zimin et al. 2009           |
| Zebu                  | <i>Bos indicus</i>                | Boin                | Bos_indicus_1.0                     | 28kb             | NCBI    | Canavez et al. 2012         |
| Yak                   | <i>Bos grunniens</i>              | Bogr                | BosGru_v2.0                         | 23kb             | NCBI    | Qiu et al. 2012             |
| Water buffalo         | <i>Bubalus bubalis</i>            | Bubu                | UMD_CASPUR_WB_2.0                   | 22kb             | NCBI    | Zimin et al. Unpublished    |
| Goat                  | <i>Capra aegagrus hircus</i>      | Cahi                | CHIR_1.0                            | 19kb             | NCBI    | Dong et al.2012             |
| Wild goat             | <i>Capra aegagrus</i>             | Caae                | Caeg1                               | 52kb             | NCBI    | Streeter et al. Unpublished |
| Sheep                 | <i>Ovis aries</i>                 | Ovar                | Oar_v3.1                            | 40kb             | Ensembl | Jiang et al. Unpublished    |
| Musimon               | <i>Ovis aries musimon</i>         | Ovmu                | Oori1                               | 40kb             | NCBI    | Streeter et al. Unpublished |
| Tibetan antelope      | <i>Pantholops hodgsonii</i>       | Paho                | PHO1.0                              | 19kb             | NCBI    | Ge et al. 2013              |
| Dolphin               | <i>Tursiops truncatus</i>         | Tutr                | turTru1                             | 10kb             | Ensembl | Gnerre et al. 2011          |
| Killer whale          | <i>Orcinus orca</i>               | Oror                | Oorc_1.1                            | 70kb             | NCBI    | Foote et al. 2012           |
| Baji                  | <i>Lipotes vexillifer</i>         | Live                | Lipotes_vexillifer_v1               | 32kb             | NCBI    | Zhou et al. 2013            |
| Sperm whale           | <i>Physeter catodon</i>           | Phca                | Physeter_macrocephalus<br>-2.0.2    | 35kb             | NCBI    | Walter et al. Unpublished   |
| Minke whale           | <i>Balaenoptera acutorostrata</i> | Baac                | BalAcu1.0                           | 23kb             | NCBI    | Zheng et al. 2014           |
| Antarctic minke whale | <i>Balaenoptera bonaerensis</i>   | BaBo                | KUjira_1.0                          | 1.7kb            | -       | Kishida et al. 2015         |
| Pig                   | <i>Sus scrofa</i>                 | Susc                | Sscrofa10.2                         | 69kb             | NCBI    | Drou et al. Unpublished     |
| Bactrian camel        | <i>Camelus bactrianus</i>         | Caba                | Ca_bactrianus_MBC_1.0               | 139kb            | NCBI    | Wu et al. Unpublished       |
| Wild Bactrian camel   | <i>Camelus ferus</i>              | Cafe                | CB1                                 | 90kb             | NCBI    | Yao et al .2012             |
| Arabian camel         | <i>Camelus dromedarius</i>        | Cadr                | PRJNA234474_Ca<br>_dromedarius_V1.0 | 69kb             | NCBI    | Wu et al. 2014              |
| Alpaca                | <i>Vicugna pacos</i>              | Vipa                | vicugna_pacos-2.0.1                 | 25kb             | NCBI    | Warren et al. Unpublished   |
| Horse                 | <i>Equus ferus caballus</i>       | Eqca                | EquCab2.0                           | 112kb            | NCBI    | Lindblad-Toh et al. 2009    |
| Przewalski's horse    | <i>Equus ferus przewalskii</i>    | Eqpr                | Burgud                              | 58kb             | NCBI    | Huang et al. 2014           |

|                           |                                |      |                      |       |         |                             |
|---------------------------|--------------------------------|------|----------------------|-------|---------|-----------------------------|
| Southern white rhinoceros | <i>Ceratotherium simum</i>     | Cesi | CerSimSim1.0         | 93kb  | NCBI    | Di et al. Unpublished       |
| Cat                       | <i>Felis catus</i>             | Feca | Felis_catus_6.2      | 21kb  | NCBI    | Pontius et al. 2007         |
| Tiger                     | <i>Panthera tigris altaica</i> | Pati | PanTig1.0            | 30kb  | NCBI    | Chu et al. 2013             |
| Walrus                    | <i>Odobenus rosmarus</i>       | Odro | Oros_1.0             | 90kb  | NCBI    | Foote et al. 2015           |
| Weddell seal              | <i>Leptonychotes weddellii</i> | Lewe | LepWed1.0            | 24kb  | NCBI    | Di et al. Unpublished       |
| Ferret                    | <i>Mustela putorius furo</i>   | Mufu | MusPutFur1.0         | 45kb  | Ensembl | Di et al. Unpublished       |
| Polar bear                | <i>Ursus maritimus</i>         | Urma | UrsMar_1.0           | 47kb  | NCBI    | Liu et al. 2014             |
| Giant Panda               | <i>Ailuropoda melanoleuca</i>  | Aime | AilMel_1.0           | 40kb  | Ensembl | Li et al. 2010              |
| Dog                       | <i>Canis lupus familiaris</i>  | Cafa | CanFam3.1            | 267kb | NCBI    | Lindblad-Toh et al. 2005    |
| Chinese pangolin          | <i>Manis pentadactyla</i>      | Mape | M_pentadactyla-1.1.1 | 29kb  | NCBI    | Wilson et al. Unpublished   |
| Brandt's bat              | <i>Myotis brandtii</i>         | Mybr | ASM41265v1           | 23kb  | NCBI    | Seim et al.2013             |
| David's myotis            | <i>Myotis davidii</i>          | Myda | ASM32734v1           | 15kb  | NCBI    | Zhang et al. 2013           |
| Little brown bat          | <i>Myotis lucifugus</i>        | Mylu | Myoluc2.0            | 64kb  | Ensembl | Di Palma et al. Unpublished |
| Big brown bat             | <i>Eptesicus fuscus</i>        | Epfu | EptFus1.0            | 21kb  | NCBI    | Di Palma et al. Unpublished |
| Large flying fox          | <i>Pteropus vampyrus</i>       | Ptva | Pvam_2.0             | 22kb  | Ensembl | Liu et al. 2014             |
| Black flying fox          | <i>Pteropus alecto</i>         | Ptal | ASM32557v1           | 32kb  | NCBI    | Zhang et al. 2013           |
| Western European hedgehog | <i>Erinaceus europaeus</i>     | Ereu | EriEur2.0            | 21kb  | NCBI    | Di Palma et al. 2012        |
| Common shrew              | <i>Sorex araneus</i>           | Soar | SorAra2.0            | 23kb  | UCSC    | Di Palma et al. 2012        |
| Star-nosed mole           | <i>Condylura cristata</i>      | Cocr | ConCri1.0            | 46kb  | NCBI    | Di Palma et al. 2012        |
| Human                     | <i>Homo sapiens</i>            | Hosa | GRCh38.p2            | 56Mb  | NCBI    |                             |
| Mouse (ALLPATHS-LG)       | <i>Mus musculus</i>            | Mumu | MmusALLPATHS1        | 16kb  | NCBI    | Gnerre et al. 2011          |

<sup>a</sup>The prefix is used to discriminate the name of orthologs in (sub)species. For example, human *TAS2R1* is referred to as Hosa*TAS2R1*.

<sup>b</sup>N50c is the contig length where 50% of the assembled genome lies in blocks of at least N50c.

## Reference:

- Zimin *et al.* 2009. A whole-genome assembly of the domestic cow, *Bos Taurus*. *Genome Biol.* 10(4):R42.
- Canavez *et al.* 2012. Genome sequence and assembly of *Bos indicus*. *J. Hered.* 103(3):342-8.
- Qiu *et al.* 2012. The yak genome and adaptation to life at high altitude. *Nat Genet.* 44(8):946-9.
- Dong *et al.* 2012. Sequencing and automated whole-genome optical mapping of the genome of a domestic goat (*Capra hircus*). *Nat Biotechnol.* 31(2):135-41.
- Ge *et al.* 2013. Draft genome sequence of the Tibetan antelope. *Nat Commun.* 4:1858.
- Gnerre *et al.* 2011. High-quality draft assemblies of mammalian genomes from massively parallel sequence data. *Proc. Natl. Acad. Sci. USA.* 108:1513–1518.
- Footo *et al.* 2015. Convergent evolution of the genomes of marine mammals. *Nat. Genet.* 47(3):272-275
- Zhou *et al.* 2013. Baiji genomes reveal low genetic variability and new insights into secondary aquatic. *Nat. Commun.* 4:2708.
- Zheng *et al.* 2014. Minke whale genome and aquatic adaptation in cetaceans. *Nat. Genet.* 46(1):88-92.
- Yao *et al.* 2012. Genome sequences of wild and domestic bactrian camels. *Nat. Commun.* 3:1202.
- Wu *et al.* 2014. Camelid genomes reveal evolution and adaptation to desert environments. *Nat Commun.* 5:518.
- Lindblad-Toh *et al.* 2009. Genome sequence, comparative analysis, and population genetics of the domestic horse. *Science.* 326(5954):865-867.
- Huang *et al.* 2014. Analysis of horse genomes provides insight into the diversification and adaptive evolution of karyotype. *Sci. Rep.* 4:4958.
- Pontius *et al.* 2007. Initial sequence and comparative analysis of the cat genome. *Genome Res.* 17(11):1675-1689.
- Chu *et al.* 2013. The tiger genome and comparative analysis with lion and snow leopard genomes. *Nat Commun.* 4:2433.
- Liu *et al.* 2014. Population genomics reveal recent speciation and rapid evolutionary adaptation in polar bears. *Cell.* 157(4):785-94.
- Li *et al.* 2010. The sequence and de novo assembly of the giant panda genome. *Nature.* 463(7279):311-7.
- Lindblad-Toh *et al.* 2005. Genome sequence, comparative analysis and haplotype structure of the domestic dog. *Nature.* 438(7069):803-19.
- Seim *et al.* 2013. Genome analysis reveals insights into physiology and longevity of the Brandt's bat *Myotis brandtii*. *Nat. Commun.* 4:2212.
- Zhang *et al.* 2013. Comparative analysis of bat genomes provides insight into the evolution of flight and immunity. *Science.* 339 (6118):456-460.
- Kishida *et al.* 2015. Aquatic adaptation and the evolution of smell and taste in whales. *Zoological Letters:* 1:9.

**Table S2.** Bitter taste receptor genes *TAS2Rs* in the genome assemblies of Laurasiatherian mammals (Please refer to the excel file Supplementary\_Table\_S2). Pseudogenes were listed in red characters. Whales and dolphins (Tutr, Oror, Live, Phma, Baac) which have lost most of the *TAS2Rs* were marked in pale red shadow, pangolin (Mape) which only have 2 *TAS2Rs* was marked in pale blue shadow, and the common shrew (Soar) with the most number of 52 *TAS2Rs* was marked in yellow shadow.

**Table S3.** Classification of Truncated *TAS2Rs* in the genome assemblies of Laurasiatherian mammals. For each species, overlapping truncated *TAS2Rs* with similar orthologies in the multiple alignments were regarded as being derived from different loci. In contrast, non-overlapping *TAS2Rs* were regarded as being derived from the same loci with gap(s).

| Assembly                  | Different orthologs                   | Overlapping <i>TAS2Rs</i><br>(potentially intact paralogs) | Non-overlapping <i>TAS2Rs</i><br>(potentially intact gene from<br>same locus) | Intact<br><i>TAS2Rs</i> | Truncated<br><i>TAS2Rs</i> | Truncated<br><i>TAS2R</i> loci | Potentially intact<br><i>TAS2Rs</i> |
|---------------------------|---------------------------------------|------------------------------------------------------------|-------------------------------------------------------------------------------|-------------------------|----------------------------|--------------------------------|-------------------------------------|
| Big brown bat             | TAS2R18BT                             | –                                                          | –                                                                             | 19                      | 1                          | 1                              | 20                                  |
| Brand't bat               | TAS2R16ET                             | TAS2R18HT, TAS2R18IT,<br>TAS2R18JT                         | TAS2R18B1T-TAS2R18B2T,<br>TAS2R18E1T-TAS2R18E2T,<br>TAS2R18F1T-TAS2R18F2T,    | 26                      | 10                         | 7                              | 33                                  |
| Cow                       | –                                     | –                                                          | TAS2R7AT-TAS2R7BT                                                             | 19                      | 2                          | 1                              | 20                                  |
| David's myotis            | TAS2R41CT,<br>TAS2R18KT,<br>TAS2R18HT | TAS2R7AT, TAS2R7BT                                         | –                                                                             | 25                      | 5                          | 5                              | 30                                  |
| Western European hedgehog | TAS2R5T                               | –                                                          | –                                                                             | 20                      | 1                          | 1                              | 21                                  |
| Little brown bat          | TAS2R41BT                             | –                                                          | TAS2R16ET- TAS2R16FT                                                          | 29                      | 3                          | 2                              | 31                                  |
| Large flying fox          | TAS2R1BT,<br>TAS2R3BT,<br>TAS2R39T    | –                                                          | –                                                                             | 15                      | 3                          | 3                              | 18                                  |
| Giant panda               | TAS2R408CT                            | –                                                          | –                                                                             | 16                      | 1                          | 1                              | 17                                  |
| Pig                       | TAS2R4BT                              | –                                                          | TAS2R1AT- TAS2R1BT                                                            | 16                      | 3                          | 2                              | 18                                  |
| Weddell seal              | TAS2R9T, TAS2R41T                     | TAS2R7AT, TAS2R7BT                                         | –                                                                             | 2                       | 4                          | 3                              | 5                                   |
| Sheep                     | TAS2R10AT                             | –                                                          | --                                                                            | 15                      | 1                          | 1                              | 16                                  |
| Common Shrew              | TAS2R372BT                            | TAS2R8HT, TAS2R8FT                                         | TAS2R408PT-TAS2R408QT,<br>TAS2R408NT-TAS2R408OT                               | 46                      | 7                          | 5                              | 51                                  |

|           |           |   |   |    |   |   |    |
|-----------|-----------|---|---|----|---|---|----|
| Tiger     | TAS2R4T   | - | - | 11 | 1 | 1 | 12 |
| Wild goat | TAS2R67BT | - | - | 19 | 1 | 1 | 20 |

---

**Table S4.** Birth genes and death genes in each branch of Laurasiatherian mammals.

| Branch | Name                       | Number of births | Birth genes                                                   | Number of deaths | Death genes                                                               |
|--------|----------------------------|------------------|---------------------------------------------------------------|------------------|---------------------------------------------------------------------------|
| 1      | Cow                        | 0                |                                                               | 2                | TAS2R2, TAS2R372                                                          |
| 2      | Zebu                       | 1                | TAS2R1A, TAS2R1B                                              | 2                | TAS2R7, TAS2R408C                                                         |
| 3      | Yak                        | 0                |                                                               | 3                | TAS2R4, TAS2R42, TAS2R18A                                                 |
| 4      | Water buffalo              | 0                |                                                               | 7                | TAS2R2, TAS2R3, TAS2R10C, TAS2R13, TAS2R408B, TAS2R408C, TAS2R18A         |
| 5      | Cow & Zebu                 | 0                |                                                               | 0                |                                                                           |
| 6      | <i>Bos</i>                 | 0                |                                                               | 2                | TAS2R8, TAS2R40                                                           |
| 7      | Bovidae                    | 0                |                                                               | 3                | TAS2R5, TAS2R11, TAS2R62                                                  |
| 8      | Goat                       | 0                |                                                               | 0                |                                                                           |
| 9      | Wild goat                  | 0                |                                                               | 2                | TAS2R40, TAS2R408D                                                        |
| 10     | Sheep                      | 0                |                                                               | 0                |                                                                           |
| 11     | Musimon                    | 0                |                                                               | 0                |                                                                           |
| 12     | Tibetan antelope           | 0                |                                                               | 8                | TAS2R11, TAS2R12, TAS2R38, TAS2R41, TAS2R42, TAS2R408D, TAS2R62, TAS2R67A |
| 13     | <i>Capra</i>               | 0                |                                                               | 0                |                                                                           |
| 14     | <i>Ovis</i>                | 0                |                                                               | 6                | TAS2R408A, TAS2R40, TAS2R42, TAS2R408C, TAS2R62, TAS2R372                 |
| 15     | <i>Ovis</i> & <i>Capra</i> | 0                |                                                               | 1                | TAS2R5                                                                    |
| 16     | Caprinae                   | 1                | TAS2R67A, TAS2R67B                                            | 5                | TAS2R8, TAS2R10C, TAS2R13, TAS2R408B                                      |
| 17     | Ruminantia                 | 4                | TAS2R408A, TAS2R408B, TAS2R408D, TAS2R10A, TAS2R10B, TAS2R10C | 0                |                                                                           |

|    |                            |   |                                            |    |                                                                                                                                                                                                                 |
|----|----------------------------|---|--------------------------------------------|----|-----------------------------------------------------------------------------------------------------------------------------------------------------------------------------------------------------------------|
| 18 | Dolphin                    | 0 |                                            | 0  |                                                                                                                                                                                                                 |
| 19 | Killer whale               | 0 |                                            | 0  |                                                                                                                                                                                                                 |
| 20 | Baji                       | 0 |                                            | 0  |                                                                                                                                                                                                                 |
| 21 | Sperm whale                | 0 |                                            | 0  |                                                                                                                                                                                                                 |
| 22 | Minke whale                | 0 |                                            | 0  |                                                                                                                                                                                                                 |
| 23 | Delphinidae                | 0 |                                            | 0  |                                                                                                                                                                                                                 |
| 24 | Delphinidae &<br>Lipotidae | 0 |                                            | 0  |                                                                                                                                                                                                                 |
| 25 | Odontoceti                 | 0 |                                            | 1  | TAS2R16                                                                                                                                                                                                         |
| 26 | Cetacean                   | 0 |                                            | 22 | TAS2R1, TAS2R2, TAS2R3, TAS2R4,<br>TAS2R5, TAS2R7, TAS2R8, TAS2R10,<br>TAS2R10C, TAS2R11, TAS2R12, TAS2R13,<br>TAS2R38, TAS2R39, TAS2R40, TAS2R41,<br>TAS2R42, TAS2R60, TAS2R18, TAS2R67,<br>TAS2R372, TAS2R408 |
| 27 |                            | 0 |                                            | 1  | TAS2R9                                                                                                                                                                                                          |
| 28 | Pig                        | 2 | TAS2R4A, TAS2R4BT, TAS2R408A,<br>TAS2R408B | 8  | TAS2R2, TAS2R5, TS2R8, TAS2R13,<br>TAS2R40, TAS2R18, TAS2R67, TAS2R372                                                                                                                                          |
| 29 |                            | 0 |                                            | 0  |                                                                                                                                                                                                                 |
| 30 | Bactrian camel             | 0 |                                            | 1  | TAS2R4                                                                                                                                                                                                          |
| 31 | Wild Bactrian camel        | 0 |                                            | 0  |                                                                                                                                                                                                                 |
| 32 | Arabian camel              | 0 |                                            | 3  | TAS2R2, TAS2R4, TS2R41                                                                                                                                                                                          |
| 33 |                            | 0 |                                            | 1  | TAS2R42                                                                                                                                                                                                         |
| 34 | <i>Camelus</i>             | 0 |                                            | 2  | TAS2R16, TAS2R40                                                                                                                                                                                                |
| 35 | Alpaca                     | 0 |                                            | 1  | TAS2R41                                                                                                                                                                                                         |
| 36 | Tylopoda                   | 0 |                                            | 10 | TAS2R5, TAS2R8, TAS2R9, TAS2R11,                                                                                                                                                                                |



|    |                              |   |                                                                                                                           |   |                                                                  |
|----|------------------------------|---|---------------------------------------------------------------------------------------------------------------------------|---|------------------------------------------------------------------|
|    |                              |   |                                                                                                                           |   | TAS2R12, TAS2R13, TAS2R60, TAS2R18,<br>TAS2R372, TAS2R408        |
| 37 | Cetartiodactyla              | 0 |                                                                                                                           | 1 | TAS2R14                                                          |
| 38 | Horse                        | 0 |                                                                                                                           | 4 | TAS2R16, TAS2R41, TAS2R42, TAS2R62F                              |
| 39 | Przewalski's horse           | 0 |                                                                                                                           | 2 | TAS2R12D, TAS2R12E                                               |
| 40 | Equidae                      | 4 | TAS2R408A, TAS2R408D, TAS2R408E,<br>TAS2R11B, TAS2R11C, TAS2R12D,<br>TAS2R12E                                             | 1 | TAS2R38                                                          |
| 41 | Southern white<br>rhinoceros | 8 | TAS2R408A, TAS2R408B, TAS2R408E,<br>TAS2R408G, TAS2R11A, TAS2R11D,<br>TAS2R11E, TAS2R12A, TAS2R12D,<br>TAS2R12B, TAS2R12C | 3 | TAS2R12E, TAS2R14, TAS2R41                                       |
| 42 | Perissodactyla               | 4 | TAS2R12A, TAS2R12B, TAS2R62A,<br>TAS2R62B, TAS2R62C, TAS2R62D                                                             | 7 | TAS2R5, TAS2R10, TAS2R13, TAS2R60,<br>TAS2R18, TAS2R67, TAS2R372 |
| 43 | Euungulata                   | 0 |                                                                                                                           | 0 |                                                                  |
| 44 | Cat                          | 0 |                                                                                                                           | 0 |                                                                  |
| 45 | Tiger                        | 0 |                                                                                                                           | 0 |                                                                  |
| 46 | Felidae                      | 1 | TAS2R408A, TAS2R408B                                                                                                      | 7 | TAS2R5, TAS2R8, TAS2R10, TAS2R39,<br>TAS2R40, TAS2R41, TAS2R62   |
| 47 | Walrus                       | 0 |                                                                                                                           | 3 | TAS2R9, TAS2R41, TAS2R408                                        |
| 48 | Weddell seal                 | 0 |                                                                                                                           | 2 | TAS2R42, TAS2R62                                                 |
| 49 | Ferret                       | 1 | TAS2R408B                                                                                                                 | 2 | TAS2R42, TAS2R62                                                 |
| 50 | Polar bear                   | 0 |                                                                                                                           | 4 | TAS2R3, TAS2R12, TAS2R408B,<br>TAS2R408C                         |
| 51 | Giant Panda                  | 0 |                                                                                                                           | 2 | TAS2R5, TAS2R62                                                  |
| 52 | Dog                          | 0 |                                                                                                                           | 3 | TAS2R4, TAS2R8, TAS2R9                                           |

|    |                               |    |                                                                                                                       |    |                                                                                                                                  |
|----|-------------------------------|----|-----------------------------------------------------------------------------------------------------------------------|----|----------------------------------------------------------------------------------------------------------------------------------|
| 53 | Chinese pangolin              | 0  |                                                                                                                       | 16 | TAS2R2, TAS2R3, TAS2R4, TAS2R5, TAS2R8, TAS2R9, TAS2R10, TAS2R408, TAS2R38, TAS2R39, TAS2R40, TAS2R41, TAS2R42, TAS2R62, TAS2R67 |
| 54 | Pinenipedia                   | 0  |                                                                                                                       | 8  | TAS2R1, TAS2R3, TAS2R4, TAS2R5, TAS2R10, TAS2R12, TAS2R38, TAS2R67                                                               |
| 55 | Pinenipedia & Ferret          | 0  |                                                                                                                       | 3  | TAS2R39, TAS2R40, TAS2R41                                                                                                        |
| 56 | Ursidae                       | 2  | TAS2R20, TAS2R30, TAS2R43                                                                                             | 1  | TAS2R67                                                                                                                          |
| 57 |                               | 0  |                                                                                                                       | 0  |                                                                                                                                  |
| 58 |                               | 0  |                                                                                                                       | 0  |                                                                                                                                  |
| 59 | Carnivora                     | 0  |                                                                                                                       | 0  |                                                                                                                                  |
| 60 | Ferae                         | 0  |                                                                                                                       | 7  | TAS2R11, TAS2R13, TAS2R14, TAS2R16, TAS2R372, TAS2R62, TAS2R18                                                                   |
| 61 | Fereuungulata                 | 0  |                                                                                                                       | 0  |                                                                                                                                  |
| 62 | Brandt's bat                  | 1  | TAS2R16ET                                                                                                             | 2  | TAS2R408A, TAS2R39                                                                                                               |
| 63 | David's myotis                | 2  | TAS2R7AT, TAS2R7BT, TAS2R41CT                                                                                         | 5  | TAS2R5, TAS2R16D, TAS2R18G, TAS2R18I, TAS2R18J                                                                                   |
| 64 | Little brown bat              | 2  | TAS2R16ET, TAS2R16FT, TAS2R41BT                                                                                       | 4  | TAS2R408C, TAS2R18G, TAS2R18H, TAS2R18I                                                                                          |
| 65 | Big brown bat                 | 0  |                                                                                                                       | 2  | TAS2R4, TAS2R408C                                                                                                                |
| 66 | Brandt's bat & David's myotis | 0  |                                                                                                                       | 0  |                                                                                                                                  |
| 67 | <i>Myotis</i>                 | 11 | TAS2R16A, TAS2R16B, TAS2R16C, TAS2R16D, TAS2R31, TAS2R43, TAS2R18A, TAS2R18B, TAS2R18C, TAS2R18D, TAS2R18E, TAS2R18F, | 0  |                                                                                                                                  |

|    |                              |    |                                                                                                                                                                                                                                                                                                                                                                                         |   |                                                                 |
|----|------------------------------|----|-----------------------------------------------------------------------------------------------------------------------------------------------------------------------------------------------------------------------------------------------------------------------------------------------------------------------------------------------------------------------------------------|---|-----------------------------------------------------------------|
|    |                              |    | TAS2R18G, TAS2R18H, TAS2R18I,<br>TAS2R18B                                                                                                                                                                                                                                                                                                                                               |   |                                                                 |
| 68 | Vespertilionidae             | 5  | TAS2R408A, TAS2R408B, TAS2R408C,<br>TAS2R408D, TAS2R41A, TAS2R41B,<br>TAS2R18A, TAS2R18B                                                                                                                                                                                                                                                                                                | 1 | TAS2R9                                                          |
| 69 | Large flying fox             | 3  | TAS2R1A, TAS2R1BT, TAS2R3A,<br>TAS2R3BT, TAS2R5A, TAS2R5B                                                                                                                                                                                                                                                                                                                               | 0 |                                                                 |
| 70 | Black flying fox             | 0  |                                                                                                                                                                                                                                                                                                                                                                                         | 1 | TAS2R408A                                                       |
| 71 | Pteropodidae                 | 1  | TAS2R43, TAS2R408B                                                                                                                                                                                                                                                                                                                                                                      | 4 | TAS2R2, TAS2R10, TAS2R11, TAS2R18                               |
| 72 | Chiroptera                   | 0  |                                                                                                                                                                                                                                                                                                                                                                                         | 7 | TAS2R8, TAS2R12, TAS2R13, TAS2R14,<br>TAS2R60, TAS2R62, TAS2R67 |
| 73 | Scrotifera                   | 0  |                                                                                                                                                                                                                                                                                                                                                                                         | 0 |                                                                 |
| 74 | Western European<br>hedgehog | 5  | TAS2R3A, TAS2R3B, TAS2R3C,<br>TAS2R4A, TAS2R4B, TAS2R19,<br>TAS2R408B, TAS2R408C,                                                                                                                                                                                                                                                                                                       | 6 | TAS2R2, TAS2R8, TAS2R13, TAS2R39,<br>TAS2R42, TAS2R67           |
| 75 | Common shrew                 | 30 | TAS2R3A, TAS2R3B, TAS2R3C,<br>TAS2R4A, TAS2R4B, TAS2R4C,<br>TAS2R7A, TAS2R7B, TAS2R8A,<br>TAS2R8C, TAS2R8E, TAS2R8G, TAS2R8I,<br>TAS2R8HT, TAS2R8FT, TAS2R11A,<br>TAS2R11B, TAS2R11C, TAS2R11D,<br>TAS2R408A, TAS2R408B, TAS2R408C,<br>TAS2R408D, TAS2R408E, TAS2R408PT,<br>TAS2R5408QT, TAS2R408F, TAS2R408G,<br>TAS2R408H, TAS2R408I, TAS2R408G,<br>TAS2R408K, TAS2R408L, TAS2R408NT, | 0 |                                                                 |

TAS2R408OT, TAS2R372A, TAS2R372BT,  
TAS2R372C

|    |                 |   |   |                          |
|----|-----------------|---|---|--------------------------|
| 76 | Star-nosed mole | 0 | 0 |                          |
| 77 | Soricomorpha    | 0 | 0 |                          |
| 78 | Eulipotyphla    | 0 | 3 | TAS2R9, TAS2R12, TAS2R16 |

---

### Supplementary Figure Legend

**Fig. S1.** (A and B) Dotplots comparing the Brandt's bat and the big brown bat assemblies containing the clade of *TAS2R16*. (C and D) Dotplots comparing the Brandt's bat and the big brown bat assemblies containing the clade of *TAS2R18*. (E and F) Dotplots comparing horse and cat assemblies containing the clades of *TAS2R11* and *TAS2R12*. (G and H) Dotplots comparing horse and cat assemblies containing the clade of *TAS2R62*. The minimum repeat length was 100 bp and the repeat identity was 90%. The *TAS2Rs* positions are shown by dashed lines.

**Fig. S2.** Forty PIC values converted from the 41 phylogenetically correlated data.

A Brandt's bat NW\_005370153.1 225 - 325kb

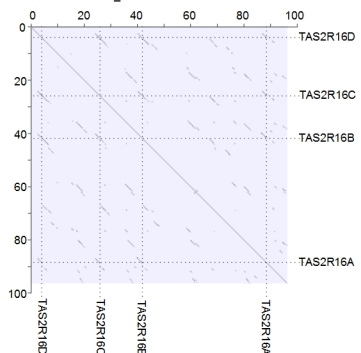

B Big Brown bat NW\_007370896.1 400 - 500kb

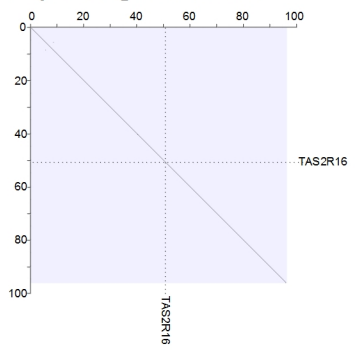

C Brandt's bat NW\_005358943.1 6805 - 6905kb

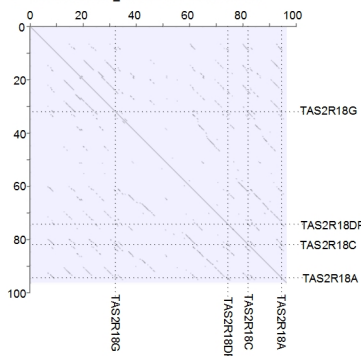

D Big Brown bat NW\_007370663.1 400 - 500kb

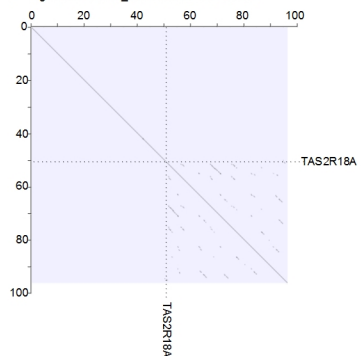

E Horse chr 6 38740 - 38920kb

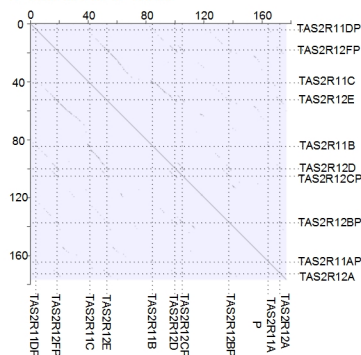

F Cat chrB4 47480 - 47580kb

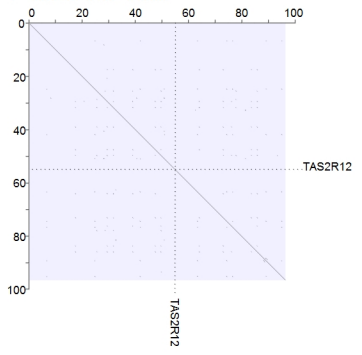

G Horse chr 4 96450 - 96550kb

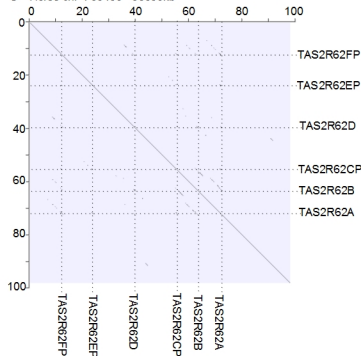

F Cat chrA2 157375 - 157425kb

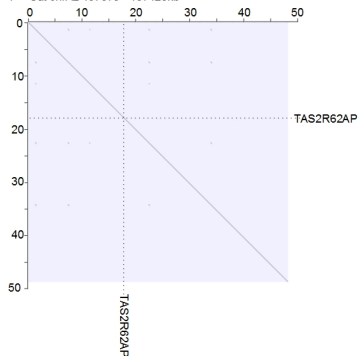

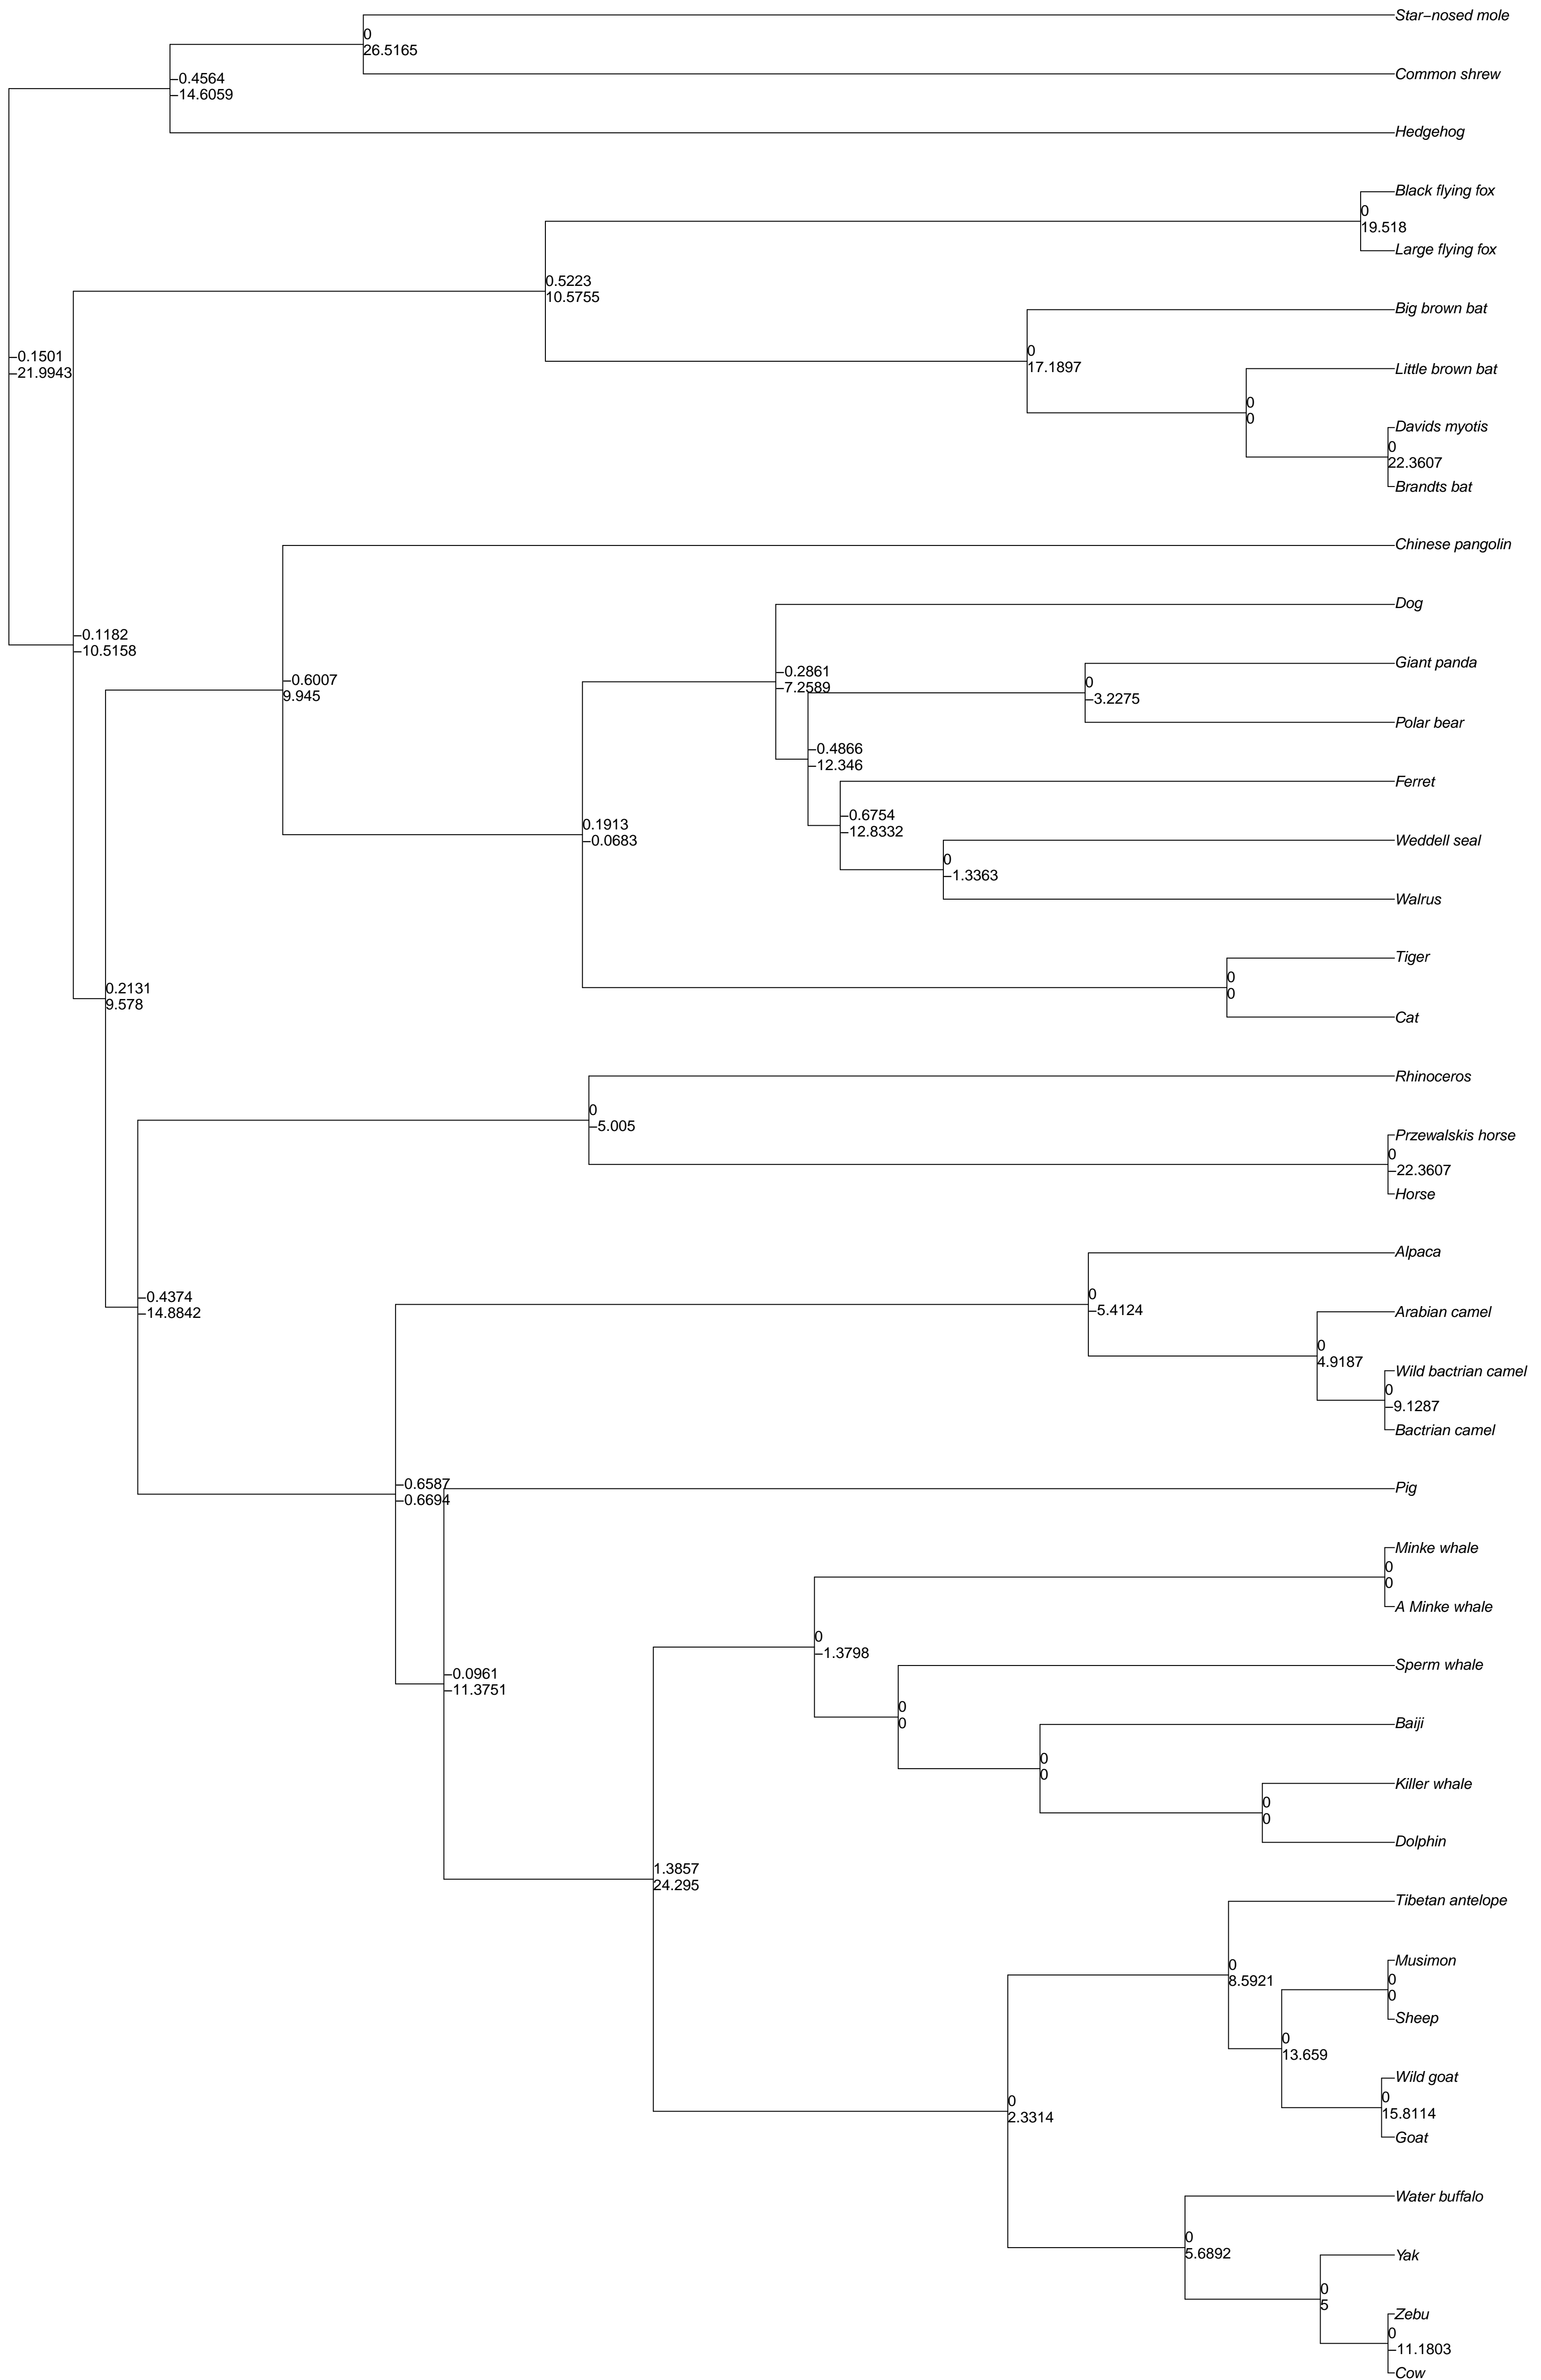

Supplement: 12983_2016_161_MOESM1_ESM.pdf [file 12983_2016_161_MOESM1_ESM.pdf]
